# Supplementary material for: Assessing the Influence of Anthropogenic Land-Use Changes on Bird Diversity and Feeding Guilds—A Case Study of Kalametiya Lagoon (Southern Sri Lanka)
Source: MDPI journal article supplement (doi:10.3390/d15030383), 2023-03-07
Supplement: s1 [file s1]

**Table S2.** Complete list of the avifauna encountered during the study period in Kalametiya. Species taxonomy followed the IOC Master list v12.1 [40]. Species Global Conservation Status (GCS) and National Conservation Status (NCS) were respectively extracted from the IUCN Red List [41] and the 2021 National Red List of Sri Lanka [42]: LC for Least Concern, NT for Near Threatened, VU for Vulnerable, EN for Endangered, CR for Critically Endangered, and DD for Data Deficient. Species phenological status were also extracted from the 2021 National Red List of Sri Lanka [42]: R for Resident, UR for Uncertain Resident, WM for Winter Migrant, UWM for Uncertain Winter Migrant. Eight feeding guilds were considered in this table : Inv for Invertebrate-feeder, Pol for Polyphage, Hrb-FG for Frugivorous-Granivorous (specialisation of the herbivorous guild), Hrb-F for Frugivorous (specialisation of the herbivorous guild), Hrb-G for Granivorous (specialisation of the herbivorous guild), Hrb-P for species consuming plant vegetative parts (specialisation of the herbivorous guild), Psc for Piscivorous, Car for Carnivorous. Three habitats were considered in this table : Sc for *Sonneratia caseolaris* dominated habitat, Sc-Ta for *S. caseolaris* – *Typha angustifolia* co-dominated habitat, Ta for *T. angustifolia* dominated habitat.

| Order           | Family              | Scientific Name                 | Taxonomic Authority | Vernacular Name        | GCS | NCS | Phenological Status | Feeding Guild | Habitat     |
|-----------------|---------------------|---------------------------------|---------------------|------------------------|-----|-----|---------------------|---------------|-------------|
| ACCIPITRIFORMES |                     |                                 |                     |                        |     |     |                     |               |             |
|                 | <i>Accipitridae</i> |                                 |                     |                        |     |     |                     |               |             |
|                 |                     | <i>Accipiter badius</i>         | (Gmelin, JF, 1788)  | Shikra                 | LC  | LC  | R                   | Car           | —           |
|                 |                     | <i>Haliastur indus</i>          | (Boddaert, 1783)    | Brahminy Kite          | LC  | LC  | R                   | Car           | —           |
| ANSERIFORMES    |                     |                                 |                     |                        |     |     |                     |               |             |
|                 | <i>Anatidae</i>     |                                 |                     |                        |     |     |                     |               |             |
|                 |                     | <i>Dendrocygna javanica</i>     | (Horsfield, 1821)   | Lesser Whistling-Duck  | LC  | LC  | R                   | Pol           | Sc/Sc-Ta/Ta |
| CHARADRIIFORMES |                     |                                 |                     |                        |     |     |                     |               |             |
|                 | <i>Burhinidae</i>   |                                 |                     |                        |     |     |                     |               |             |
|                 |                     | <i>Esacus recurvirostris</i>    | (Cuvier, 1829)      | Great Stone-Curlew     | NT  | LC  | R                   | Inv           | —           |
|                 | <i>Charadriidae</i> |                                 |                     |                        |     |     |                     |               |             |
|                 |                     | <i>Vanellus indicus</i>         | (Boddaert, 1783)    | Red-wattled Lapwing    | LC  | LC  | R                   | Inv           | Sc/Ta       |
|                 |                     | <i>Vanellus malabicus</i>       | (Boddaert, 1783)    | Yellow-wattled Lapwing | LC  | LC  | R                   | Inv           | Sc          |
|                 | <i>Jacanidae</i>    |                                 |                     |                        |     |     |                     |               |             |
|                 |                     | <i>Hydrophasianus chirurgus</i> | (Scopoli, 1786)     | Pheasant-tailed Jacana | LC  | LC  | R                   | Inv           | Ta          |
|                 | <i>Laridae</i>      |                                 |                     |                        |     |     |                     |               |             |
|                 |                     | <i>Sterna hirundo</i>           | Linnaeus, 1758      | Common Tern            | LC  | CR  | R/WM                | Pol           | Ta          |

|                              |                     |                              |    |    |    |        |             |
|------------------------------|---------------------|------------------------------|----|----|----|--------|-------------|
| <i>Sternula albifrons</i>    | (Pallas, 1764)      | Little Tern                  | LC | VU | R  | Pol    | Sc/Ta       |
| <i>Recurvirostridae</i>      |                     |                              |    |    |    |        |             |
| <i>Himantopus himantopus</i> | (Linnaeus, 1758)    | Black-winged Stilt           | LC | LC | R  | Inv    | Sc/Ta       |
| <i>Scolopacidae</i>          |                     |                              |    |    |    |        |             |
| <i>Actitis hypoleucos</i>    | (Linnaeus, 1758)    | Common Sandpiper             | LC | —  | WM | Inv    | —           |
| <i>Tringa glareola</i>       | Linnaeus, 1758      | Wood Sandpiper               | LC | —  | WM | Pol    | —           |
| <i>Tringa totanus</i>        | (Linnaeus, 1758)    | Common Redshank              | LC | —  | WM | Inv    | Sc          |
| CICONIIFORMES                |                     |                              |    |    |    |        |             |
| <i>Ciconiidae</i>            |                     |                              |    |    |    |        |             |
| <i>Anastomus oscitans</i>    | (Boddaert, 1783)    | Asian Openbill               | LC | LC | R  | Inv    | Sc/Ta       |
| <i>Mycteria leucocephala</i> | (Pennant, 1769)     | Painted Stork                | NT | LC | R  | Psc    | Sc/Ta       |
| COLUMBIFORMES                |                     |                              |    |    |    |        |             |
| <i>Columbidae</i>            |                     |                              |    |    |    |        |             |
| <i>Chalcophaps indica</i>    | (Linnaeus, 1758)    | Common Emerald Dove          | LC | LC | R  | Hrb-FG | Ta          |
| <i>Columba livia</i>         | Gmelin, JF, 1789    | Rock Dove                    | LC | CR | R  | Hrb-FG | Sc/Ta       |
| <i>Ducula aenea</i>          | (Linnaeus, 1766)    | Green Imperial Pigeon        | NT | LC | R  | Hrb-F  | Sc/Sc-Ta/Ta |
| <i>Spilopelia chinensis</i>  | (Scopoli, 1786)     | Spotted Dove                 | LC | LC | R  | Hrb-FG | Sc/Ta       |
| <i>Streptopelia decaocto</i> | (Frivaldszky, 1838) | Eurasian Collared Dove       | LC | NT | R  | Hrb-FG | —           |
| <i>Treron bicinctus</i>      | (Jerdon, 1840)      | Orange-breasted Green Pigeon | LC | LC | R  | Hrb-F  | Sc          |
| CORACIIFORMES                |                     |                              |    |    |    |        |             |
| <i>Alcedinidae</i>           |                     |                              |    |    |    |        |             |
| <i>Alcedo atthis</i>         | (Linnaeus, 1758)    | Common Kingfisher            | LC | LC | R  | Psc    | Sc/Ta       |
| <i>Ceryle rudis</i>          | (Linnaeus, 1758)    | Pied Kingfisher              | LC | LC | R  | Psc    | Ta          |
| <i>Halcyon smyrnensis</i>    | (Linnaeus, 1758)    | White-throated Kingfisher    | LC | LC | R  | Pol    | Sc/Sc-Ta/Ta |
| <i>Pelargopsis capensis</i>  | (Linnaeus, 1766)    | Stork-billed Kingfisher      | LC | LC | R  | Pol    | Sc          |
| <i>Meropidae</i>             |                     |                              |    |    |    |        |             |
| <i>Merops leschenaulti</i>   | Vieillot, 1817      | Chestnut-headed Bee-Eater    | LC | NT | R  | Inv    | —           |

|                                 |                              |                           |    |    |             |       |             |
|---------------------------------|------------------------------|---------------------------|----|----|-------------|-------|-------------|
| <i>Merops orientalis</i>        | Latham, 1801                 | Asian Green Bee-Eater     | LC | LC | R           | Inv   | Sc          |
| <i>Merops philippinus</i>       | Linnaeus, 1767               | Blue-tailed Bee-Eater     | LC | CR | R/WM        | Inv   | Sc/Sc-Ta/Ta |
| CUCULIFORMES                    |                              |                           |    |    |             |       |             |
| <i>Cuculidae</i>                |                              |                           |    |    |             |       |             |
| <i>Centropus sinensis</i>       | (Stephens, 1815)             | Greater Coucal            | LC | LC | R           | Pol   | Sc/Sc-Ta/Ta |
| <i>Clamator jacobinus</i>       | (Boddaert, 1783)             | Jacobin Cuckoo            | LC | LC | R           | Inv   | —           |
| <i>Eudynamys scolopaceus</i>    | (Linnaeus, 1758)             | Asian Koel                | LC | LC | R           | Hrb-F | Sc/Ta       |
| GALLIFORMES                     |                              |                           |    |    |             |       |             |
| <i>Phasianidae</i>              |                              |                           |    |    |             |       |             |
| <i>Gallus lafayetii</i>         | Lesson, R, 1831              | Sri Lanka Junglefowl      | LC | LC | R (Endemic) | Pol   | —           |
| <i>Pavo cristatus</i>           | Linnaeus, 1758               | Indian Peafowl            | LC | LC | R           | Pol   | Sc/Ta       |
| GRUIFORMES                      |                              |                           |    |    |             |       |             |
| <i>Rallidae</i>                 |                              |                           |    |    |             |       |             |
| <i>Amaurornis phoenicurus</i>   | (Pennant, 1769)              | White-breasted Waterhen   | LC | LC | R           | Pol   | Sc          |
| <i>Gallinula chloropus</i>      | (Linnaeus, 1758)             | Common Moorhen            | LC | LC | R           | Pol   | —           |
| <i>Porphyrio poliocephalus</i>  | (Latham, 1801)               | Grey-headed Swampphen     | LC | LC | R           | Hrb   | Sc-Ta       |
| PASSERIFORMES                   |                              |                           |    |    |             |       |             |
| <i>Acrocephalidae</i>           |                              |                           |    |    |             |       |             |
| <i>Acrocephalus stentoreus</i>  | (Hemprich & Ehrenberg, 1833) | Clamorous Reed-Warbler    | LC | EN | R           | Inv   | —           |
| <i>Campephagidae</i>            |                              |                           |    |    |             |       |             |
| <i>Lalage melanoptera</i>       | (Rüppell, 1839)              | Black-headed Cuckooshrike | LC | LC | R           | Inv   | Sc/Ta       |
| <i>Pericrocotus cinnamomeus</i> | (Linnaeus, 1766)             | Small Minivet             | LC | LC | R           | Inv   | —           |
| <i>Cisticolidae</i>             |                              |                           |    |    |             |       |             |
| <i>Orthotomus sutorius</i>      | (Pennant, 1769)              | Common Tailorbird         | LC | LC | R           | Inv   | Sc/Ta       |
| <i>Prinia inornata</i>          | Sykes, 1832                  | Plain Prinia              | LC | LC | R           | Inv   | Sc          |
| <i>Prinia socialis</i>          | Sykes, 1832                  | Ashy Prinia               | LC | LC | R           | Inv   | Ta          |
| <i>Corvidae</i>                 |                              |                           |    |    |             |       |             |

|                                |                     |                            |    |    |             |       |             |
|--------------------------------|---------------------|----------------------------|----|----|-------------|-------|-------------|
| <i>Corvus splendens</i>        | Vieillot, 1817      | House Crow                 | LC | LC | R           | Pol   | Sc/Sc-Ta/Ta |
| <i>Dicaeidae</i>               |                     |                            |    |    |             |       |             |
| <i>Dicaeum erythrorhynchos</i> | (Latham, 1790)      | Pale-billed Flowerpecker   | LC | LC | R           | Hrb-F |             |
| <i>Dicaeum vincens</i>         | (Sclater, PL, 1872) | Legge's Flowerpecker       | NT | EN | R (Endemic) | Hrb-F | Sc          |
| <i>Estrildidae</i>             |                     |                            |    |    |             |       |             |
| <i>Lonchura malacca</i>        | (Linnaeus, 1766)    | Tricolored munia           | LC | NT | R           | Hrb-G | Sc/Ta       |
| <i>Lonchura punctulata</i>     | (Linnaeus, 1758)    | Scaly-breasted Munia       | LC | LC | R           | Hrb-G | Sc          |
| <i>Hirundinidae</i>            |                     |                            |    |    |             |       |             |
| <i>Cecropis hyperythra</i>     | (Blyth, 1849)       | Sri Lanka Swallow          | LC | LC | R (Endemic) | Inv   |             |
| <i>Hirundo rustica</i>         | Linnaeus, 1758      | Barn Swallow               | LC | —  | WM          | Inv   | Sc/Ta       |
| <i>Laniidae</i>                |                     |                            |    |    |             |       |             |
| <i>Lanius cristatus</i>        | Linnaeus, 1758      | Brown Shrike               | LC | —  | WM          | Inv   | Sc          |
| <i>Leiotrichidae</i>           |                     |                            |    |    |             |       |             |
| <i>Argya affinis</i>           | (Jerdon, 1845)      | Yellow-billed Babbler      | LC | LC | R           | Pol   | Sc/Ta       |
| <i>Monarchidae</i>             |                     |                            |    |    |             |       |             |
| <i>Terpsiphone paradisi</i>    | (Linnaeus, 1758)    | Indian Paradise Flycatcher | LC | LC | R/WM        | Inv   | —           |
| <i>Motacillidae</i>            |                     |                            |    |    |             |       |             |
| <i>Anthus rufulus</i>          | Vieillot, 1818      | Paddyfield Pipit           | LC | LC | R           | Inv   | Sc/Sc-Ta    |
| <i>Motacilla cinerea</i>       | Tunstall, 1771      | Grey Wagtail               | LC | —  | WM          | Inv   | Sc          |
| <i>Muscicapidae</i>            |                     |                            |    |    |             |       |             |
| <i>Copsychus saularis</i>      | (Linnaeus, 1758)    | Oriental Magpie-Robin      | LC | LC | R           | Inv   | Sc          |
| <i>Nectariniidae</i>           |                     |                            |    |    |             |       |             |
| <i>Leptocoma zeylonica</i>     | (Linnaeus, 1766)    | Purple-rumped Sunbird      | LC | LC | R           | Inv   | Sc/Sc-Ta/Ta |
| <i>Oriolidae</i>               |                     |                            |    |    |             |       |             |
| <i>Oriolus xanthornus</i>      | (Linnaeus, 1758)    | Black-hooded Oriole        | LC | LC | R           | Hrb-F | Sc/Ta       |
| <i>Pycnonotidae</i>            |                     |                            |    |    |             |       |             |
| <i>Pycnonotus cafer</i>        | (Linnaeus, 1766)    | Red-vented Bulbul          | LC | LC | R           | Hrb-F | Sc          |

|                                    |                           |                      |    |    |             |       |             |
|------------------------------------|---------------------------|----------------------|----|----|-------------|-------|-------------|
| <i>Pycnonotus luteolus</i>         | (Lesson, R, 1841)         | White-browed Bulbul  | LC | LC | R           | Hrb-F | Sc          |
| <i>Rhipiduridae</i>                |                           |                      |    |    |             |       |             |
| <i>Rhipidura aureola</i>           | Lesson, R, 1831           | White-browed Fantail | LC | LC | R           | Inv   | Ta          |
| <i>Sturnidae</i>                   |                           |                      |    |    |             |       |             |
| <i>Acridotheres tristis</i>        | (Linnaeus, 1766)          | Common Myna          | LC | LC | R           | Pol   | Sc/Ta       |
| PELECANIFORMES                     |                           |                      |    |    |             |       |             |
| <i>Ardeidae</i>                    |                           |                      |    |    |             |       |             |
| <i>Ardea alba</i>                  | Linnaeus, 1758            | Great Egret          | LC | LC | R           | Psc   | —           |
| <i>Ardea cinerea</i>               | Linnaeus, 1758            | Grey Heron           | LC | LC | R           | Psc   | Ta          |
| <i>Ardea intermedia</i>            | Wagler, 1829              | Intermediate Egret   | LC | LC | R           | Psc   | Sc/Sc-Ta/Ta |
| <i>Ardea purpurea</i>              | Sykes, 1832               | Purple Heron         | LC | LC | R           | Pol   | Sc/Sc-Ta/Ta |
| <i>Ardeola Grayii</i>              | (Sykes, 1832)             | Indian Pond Heron    | LC | LC | R           | Pol   | Sc/Ta       |
| <i>Bubulcus ibis</i>               | (Linnaeus, 1758)          | Western Cattle Egret | LC | LC | R           | Inv   | —           |
| <i>Egretta garzetta</i>            | (Linnaeus, 1766)          | Little Egret         | LC | LC | R           | Pol   | Sc/Ta       |
| <i>Ixobrychus sinensis</i>         | (Gmelin, JF, 1789)        | Yellow Bittern       | LC | EN | R           | Inv   | Ta          |
| <i>Pelecanidae</i>                 |                           |                      |    |    |             |       |             |
| <i>Pelecanus philippensis</i>      | Gmelin, JF, 1789          | Spot-billed Pelican  | NT | LC | R           | Psc   | Sc/Ta       |
| <i>Threskiornithidae</i>           |                           |                      |    |    |             |       |             |
| <i>Plegadis falcinellus</i>        | (Linnaeus, 1766)          | Glossy Ibis          | LC | DD | WM/UR       | Pol   | —           |
| <i>Threskiornis melanocephalus</i> | (Latham, 1790)            | Black-headed Ibis    | NT | LC | R           | Pol   | Sc/Sc-Ta/Ta |
| PICIFORMES                         |                           |                      |    |    |             |       |             |
| <i>Megalaimidae</i>                |                           |                      |    |    |             |       |             |
| <i>Psilopogon haemacephalus</i>    | (Müller, PLS, 1776)       | Coppersmith Barbet   | LC | LC | R           | Hrb-F | —           |
| <i>Psilopogon zeylanicus</i>       | (Gmelin, JF, 1788)        | Brown-headed Barbet  | LC | LC | R           | Hrb-F | Sc/Sc-Ta/Ta |
| <i>Picidae</i>                     |                           |                      |    |    |             |       |             |
| <i>Dinopium psarodes</i>           | (Lichtenstein, AAH, 1793) | Red-backed Flameback | LC | LC | R (Endemic) | Inv   | Sc/Ta       |
| PSITTACIFORMES                     |                           |                      |    |    |             |       |             |

|                                  |                  |                      |    |    |   |  |        |             |
|----------------------------------|------------------|----------------------|----|----|---|--|--------|-------------|
| <i>Psittacidae</i>               |                  |                      |    |    |   |  |        |             |
| <i>Psittacula krameri</i>        | (Scopoli, 1769)  | Rose-ringed Parakeet | LC | LC | R |  | Hrb-FG | Sc/Ta       |
| SULIFORMES                       |                  |                      |    |    |   |  |        |             |
| <i>Anhingidae</i>                |                  |                      |    |    |   |  |        |             |
| <i>Anhinga melanogaster</i>      | Pennant, 1769    | Oriental Darter      | NT | LC | R |  | Psc    | Sc/Sc-Ta/Ta |
| <i>Phalacrocoracidae</i>         |                  |                      |    |    |   |  |        |             |
| <i>Microcarbo niger</i>          | (Vieillot, 1817) | Little Cormorant     | LC | LC | R |  | Psc    | Sc-Ta/Ta    |
| <i>Phalacrocorax fuscicollis</i> | Stephens, 1826   | Indian Cormorant     | LC | LC | R |  | Psc    | —           |
