# Supplementary material for: Assessing the Influence of Anthropogenic Land-Use Changes on Bird Diversity and Feeding Guilds—A Case Study of Kalametiya Lagoon (Southern Sri Lanka)
Source: MDPI journal article supplement (doi:10.3390/d15030383), 2023-03-07
Supplement: s1 [file s1]

**Table S1.** Sampling site coordinates, habitat affiliation, and species richness. Coordinates are extracted from ArcGIS Pro 2.9 on the UTM WGS 84 coordinate system. The cover % of the dominating habitat is provided for each site affiliated to a habitat. Total S stands for the site total observed species richness.

| Sampling site       | Longitude    | Latitude    | Affiliation (Cover %) | Total S |
|---------------------|--------------|-------------|-----------------------|---------|
| <b>Transect I</b>   |              |             |                       |         |
| i1                  | 80.9350555°E | 6.0798573°N | —                     | 7       |
| i2                  | 80.9342240°E | 6.0808904°N | —                     | 11      |
| i3                  | 80.9337624°E | 6.0817754°N | —                     | 11      |
| i4                  | 80.9336214°E | 6.0827169°N | —                     | 11      |
| i5                  | 80.9336035°E | 6.0850336°N | —                     | 16      |
| i6                  | 80.9335857°E | 6.0869589°N | —                     | 18      |
| i7                  | 80.9331310°E | 6.0891345°N | Sc (93%)              | 18      |
| i8                  | 80.9325529°E | 6.0919484°N | —                     | 17      |
| i9                  | 80.9320982°E | 6.0941486°N | Sc (100%)             | 12      |
| i10                 | 80.9312628°E | 6.0981402°N | —                     | 17      |
| i11                 | 80.9304591°E | 6.1019801°N | —                     | 16      |
| i12                 | 80.9298880°E | 6.1047164°N | —                     | 12      |
| <b>Transect II</b>  |              |             |                       |         |
| ii1                 | 80.9349709°E | 6.0857518°N | —                     | 17      |
| ii2                 | 80.9350423°E | 6.0868868°N | Ta (81%)              | 22      |
| ii3                 | 80.9350146°E | 6.0887436°N | Ta (87%)              | 27      |
| ii4                 | 80.9364175°E | 6.0902457°N | Ta (87%)              | 22      |
| ii5                 | 80.9368809°E | 6.0920265°N | Ta (89%)              | 22      |
| ii6                 | 80.9374309°E | 6.0934866°N | Ta (84%)              | 20      |
| <b>Transect III</b> |              |             |                       |         |
| iii1                | 80.9360824°E | 6.0837040°N | —                     | 22      |
| iii2                | 80.9376059°E | 6.0848075°N | —                     | 16      |
| iii3                | 80.9391812°E | 6.0863600°N | —                     | 16      |
| iii4                | 80.9408495°E | 6.0872245°N | —                     | 17      |
| iii5                | 80.9427320°E | 6.0876490°N | —                     | 10      |
| iii6                | 80.9453719°E | 6.0890823°N | Sc-Ta (79%)           | 14      |
| iii7                | 80.9471212°E | 6.0913754°N | —                     | 14      |
| iii8                | 80.9499550°E | 6.0929982°N | —                     | 15      |
| iii9                | 80.9517159°E | 6.0925019°N | —                     | 13      |
| <b>Transect IV</b>  |              |             |                       |         |
| iv1                 | 80.953872°E  | 6.092780°N  | —                     | 15      |
| iv2                 | 80.953696°E  | 6.093255°N  | —                     | 15      |
| iv3                 | 80.953470°E  | 6.094133°N  | Sc (85%)              | 13      |
| iv4                 | 80.953244°E  | 6.094950°N  | Sc (98%)              | 15      |
| iv5                 | 80.953059°E  | 6.095727°N  | Sc (96%)              | 18      |
| iv6                 | 80.952874°E  | 6.096319°N  | Sc (91%)              | 15      |
| iv7                 | 80.952627°E  | 6.097280°N  | Sc (83%)              | 14      |
| iv8                 | 80.952299°E  | 6.098524°N  | Sc (78%)              | 13      |
| iv9                 | 80.952033°E  | 6.099544°N  | Sc (100%)             | 12      |
| iv10                | 80.951797°E  | 6.100330°N  | Sc (100%)             | 14      |
